# Supplementary material
Source: ML conference proceedings conference paper supplement (https://proceedings.neurips.cc/paper_files/paper/2017/hash/9a1756fd0c741126d7bbd4b692ccbd91-Abstract.html)
Supplement: Supplementary file [file 9a1756fd0c741126d7bbd4b692ccbd91-Supplemental.zip]

## A Additional proofs

**Lemma 2.** For each iteration  $k$ , on the event  $\delta_k \leq \delta_k^-$ , we have

$$\mathbb{P}(\ell'_k \geq \eta m'_k \mid \mathcal{M}_k^-) \geq \zeta_0 \zeta_1 > \frac{1}{2}. \quad (26)$$

*Proof.* Let  $A_k$  denote the event that

$$\mathcal{L}'_k - \eta m'_k \geq \nu_1 \|\nabla \mathcal{L}_k\| \delta_k. \quad (27)$$

By Lemma 3,

$$\mathbb{P}(A_k \mid \mathcal{M}_k^-) \geq \mathbb{P}(c_1 \delta_k - c_2 \delta_k^2 \geq \nu_1 \|\nabla \mathcal{L}_k\| \delta_k \mid \mathcal{M}_k^-) \quad (28)$$

$$= \mathbb{P}(c_1 - \nu_1 \|\nabla \mathcal{L}_k\| - c_2 \delta_k \geq 0 \mid \mathcal{M}_k^-). \quad (29)$$

By Condition 2, with probability  $\zeta_0$ ,

$$c_1 \geq (\nu_1 + \nu_3) \|\nabla \mathcal{L}_k\| \quad (30)$$

and

$$c_2 \leq \frac{4\kappa_H}{\nu_2} + \frac{L}{2} + \frac{\eta\kappa_H}{2}. \quad (31)$$

Therefore, for  $\delta_k$  small enough to meet the conditions of the lemma,

$$\mathbb{P}(A_k \mid \mathcal{M}_k^-) \geq \zeta_0. \quad (32)$$

Now, suppose  $A_k$  holds. Hoeffding's inequality applies by Condition 4. Inequality 13 lets us cancel the remaining iteration-specific variables:

$$\mathbb{P}(\ell'_k \geq \eta m'_k \mid \mathcal{M}_k^+) = 1 - \mathbb{P}(\mathcal{L}'_k - \ell'_k \geq \mathcal{L}'_k - \eta m'_k \mid \mathcal{M}_k^+) \quad (33)$$

$$\geq 1 - \exp \left\{ -\frac{(\mathcal{L}'_k - \eta m'_k)^2 N_k}{2\sigma_k^2} \right\} \quad (34)$$

$$\geq 1 - \exp \left\{ -\frac{\nu_1^2 \|\nabla \mathcal{L}_k\|^2 \delta_k^2 N_k}{2\sigma_k^2} \right\} \quad (35)$$

$$\geq \zeta_1. \quad (36)$$

The lemma follows because

$$\mathbb{P}(\ell'_k \geq \eta m'_k \mid \mathcal{M}_k^-) \geq \mathbb{P}(A_k \mid \mathcal{M}_k^-) \mathbb{P}(\ell'_k \geq \eta m'_k \mid \mathcal{M}_k^+, A_k). \quad (37)$$

□

**Lemma 3.** Define

$$c_1 \triangleq [\nabla \mathcal{L}_k]^\top \frac{g_k}{\|g_k\|} - \eta \|g_k\| \quad \text{and} \quad c_2 \triangleq 4\kappa_H \frac{\|\nabla \mathcal{L}_k\|}{\|g_k\|} + \frac{L}{2} + \frac{\eta\kappa_H}{2}. \quad (38)$$

If  $\delta_k \leq \delta_k^-$ , then

$$\mathcal{L}'_k - \eta m'_k \geq c_1 \delta_k - c_2 \delta_k^2 \text{ a.s.} \quad (39)$$

*Proof.* By Condition 1, for some  $t \in (0, 1)$ ,

$$\mathcal{L}'_k = \mathcal{L}(\omega_k + s_k) - \mathcal{L}_k \quad (40)$$

$$= s_k^\top \nabla \mathcal{L}_k + \frac{1}{2} s_k^\top [\nabla^2 \mathcal{L}(\omega_k + ts_k)] s_k \quad (41)$$

$$\geq s_k^\top \nabla \mathcal{L}_k - \frac{L}{2} \delta_k^2. \quad (42)$$

To lower bound the first term, we first express the proposed step  $s_k$  in terms of  $g_k$ . Because  $s_k$  solves

$$\min_s g_k^\top s + \frac{1}{2} s^\top H_k s : \|s\| \leq \delta_k, \quad (43)$$

there exists  $\alpha_k \geq 0$  such that

$$(H_k + \alpha_k I)s_k = g_k. \quad (44)$$

The matrix  $(H_k + \alpha_k I)$  is PSD. It follows that

$$\|(H_k + \alpha_k I)^{-1}g_k\| \leq \delta_k. \quad (45)$$

Therefore, by Condition 3,

$$\alpha_k \geq \frac{\|g_k\|}{\delta_k} - \kappa_H. \quad (46)$$

By Equality 44 and Inequality 46,

$$g_k^\top s_k = [(H_k + \alpha_k I)s_k]^\top s_k \quad (47)$$

$$= s^\top H_k s_k + \alpha_k s^\top s_k \quad (48)$$

$$\geq -\kappa_H \delta_k^2 + \alpha_k \delta_k^2 \quad (49)$$

$$\geq \|g_k\| \delta_k - 2\kappa_H \delta_k^2. \quad (50)$$

It follows that

$$s_k = \beta_k \frac{g_k}{\|g_k\|} + g^\perp, \quad (51)$$

for

$$\beta_k \geq \delta_k - \frac{2\kappa_H}{\|g_k\|} \delta_k^2. \quad (52)$$

for some  $g^\perp \perp g_k$ . For any  $g^\perp$ ,

$$\|g^\perp\| \leq \frac{2\kappa_H}{\|g_k\|} \delta_k^2. \quad (53)$$

Now, with  $s_k$  expressed in terms of  $g_k$ , we lower bound the first term of Equation 42:

$$s_k^\top \nabla \mathcal{L}_k \geq \beta_k [\nabla \mathcal{L}_k]^\top \frac{g_k}{\|g_k\|} - \|\nabla \mathcal{L}_k\| \frac{2\kappa_H \delta_k^2}{\|g_k\|} \quad (54)$$

$$\geq \left[ \delta_k - \frac{2\kappa_H}{\|g_k\|} \delta_k^2 \right] [\nabla \mathcal{L}_k]^\top \frac{g_k}{\|g_k\|} - \|\nabla \mathcal{L}_k\| \frac{2\kappa_H \delta_k^2}{\|g_k\|} \quad (55)$$

$$\geq [\nabla \mathcal{L}_k]^\top \frac{g_k}{\|g_k\|} \delta_k - 4\kappa_H \frac{\|\nabla \mathcal{L}_k\|}{\|g_k\|} \delta_k^2 \quad (56)$$

Now, turning our attention to the improvement to the quadratic model:

$$m'_k = g_k^\top + \frac{1}{2} s_k^\top H_k s_k \quad (57)$$

$$\leq \|g_k\| \delta_k + \frac{\kappa_H}{2} \delta_k^2. \quad (58)$$

The lemma follows from Inequality 42, Inequality 56, and Inequality 58.  $\square$

## B Additional experiments

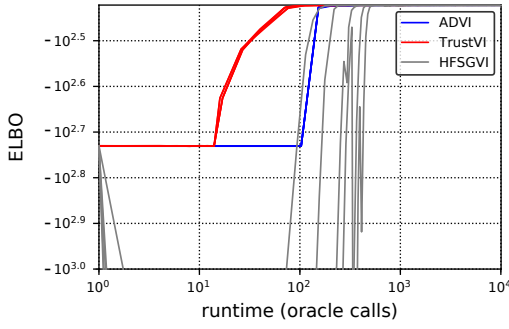

(a) Multinomial logistic regression (“Alligators”) from [23]. 56-dimensional domain.

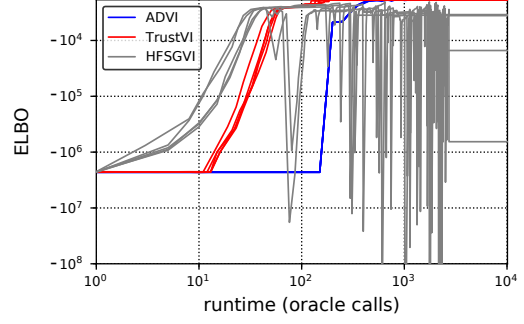

(b) A linear model with two predictors and interaction centered using conventional points (“Kid IQ interaction c2”) from [20]. 10-dimensional domain.

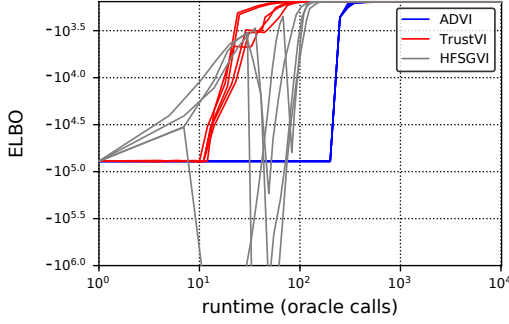

(c) A linear model with two predictors and a log log transformation (“Log Earn Log Height”) from [20]. 8-dimensional domain.

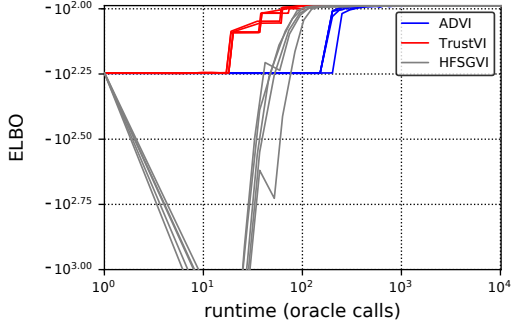

(d) Random effect logistic regression (“Seeds”) from [24]. 346-dimensional domain.

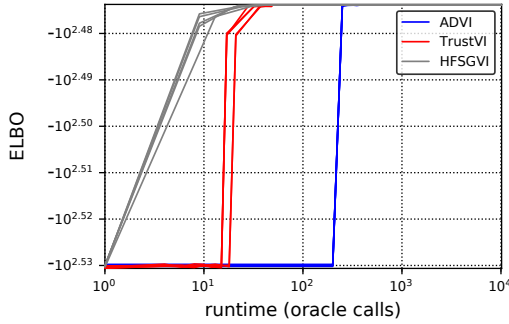

(e) Estimation of the Size of a Closed Population from Capture-Recapture Data (“Mt”) from [25]. 8-dimensional domain.

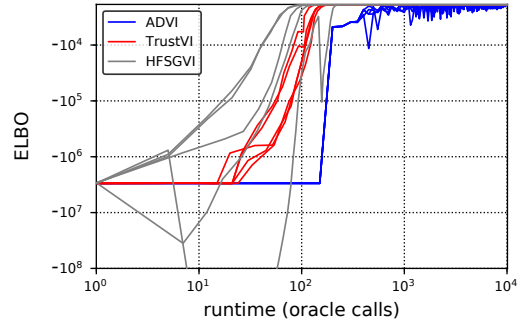

(f) A linear model with two predictors and interaction (“Kid IQ interaction”) from [20]. 10-dimensional domain.

Figure 2: Each panel shows optimization paths for five runs of ADVI, TrustVI, and HFSGVI, for a particular dataset and statistical model. Both axes are log scale.
